# Supplementary material
Source: PubMed Central journal article supplement (PMC11589905)
Supplement: NIHPP2024.07.25.605098v4-supplement-4.pdf [file NIHPP2024.07.25.605098v4-supplement-4.pdf]

647 **Tables**

648 **Table S1. Significant genes from Cycle 3 of genome-wide BHK-21 screen (median log<sub>2</sub>**  
649 **fold-change < -1 or > 1 and FDR < 0.1)**

| Gene     | Median Log <sub>2</sub> FC | FDR      |
|----------|----------------------------|----------|
| Rps29    | 1.3794                     | 0.017327 |
| Dld      | -1.7915                    | 0.003094 |
| Eefsec   | -2.1607                    | 0.000707 |
| Gpx4     | -2.2215                    | 0.000707 |
| Lias     | -1.1881                    | 0.011251 |
| Lipt1    | -1.1444                    | 0.05562  |
| Pstk     | -2.3621                    | 0.000707 |
| Secisbp2 | -1.1041                    | 0.000707 |
| Sepsecs  | -2.3116                    | 0.000707 |
| Ybey     | -1.5789                    | 0.017492 |

650

651 **Table S3. Significant genes from 15 days 4°C of genome-wide BHK-21 screen (median**  
652 **log<sub>2</sub> fold-change < -0.5 or > 0.5 and FDR < 0.1)**

| Gene         | Median Log <sub>2</sub> FC | FDR      |
|--------------|----------------------------|----------|
| LOC101827392 | 0.5431                     | 0.066832 |
| Eefsec       | -0.81913                   | 0.00165  |
| Gpx4         | -1.5133                    | 0.00165  |
| Secisbp2     | -0.74996                   | 0.00165  |

653

654 **Table S4. Significant genes from Cycle 3, 4°C + ferrostatin-1 vs 4°C of genome-wide K562**  
655 **screen (median log<sub>2</sub> fold-change < -0.5 or > 0.5 and FDR < 0.1)**

| Gene    | Median Log <sub>2</sub> FC | FDR      |
|---------|----------------------------|----------|
| UBA3    | 0.59092                    | 0.035754 |
| PSTK    | 0.85375                    | 0.000707 |
| GPX4    | 1.3025                     | 0.000707 |
| CMIP    | 0.83519                    | 0.09946  |
| OXSM    | 0.82371                    | 0.003094 |
| HSCB    | 1.0999                     | 0.060891 |
| FTH1    | 1.4415                     | 0.000707 |
| SEPHS2  | 0.98322                    | 0.000707 |
| EEFSEC  | 0.91866                    | 0.000707 |
| FDXR    | 1.2588                     | 0.000707 |
| SEPSECS | 0.9745                     | 0.000707 |

656

657

658

659

1226 Supplement

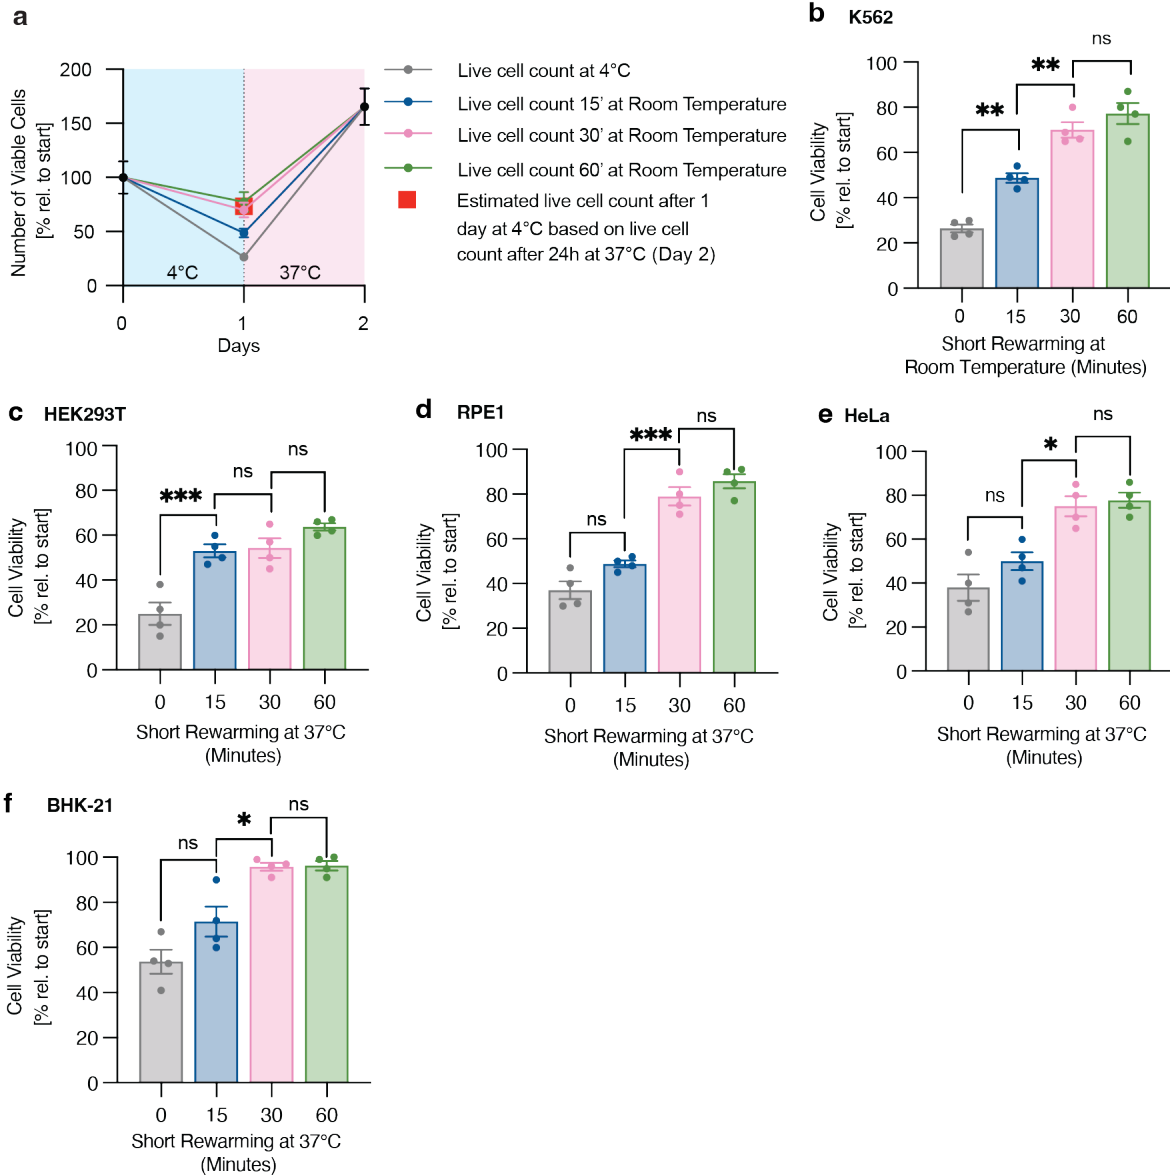

1227

1228

1229 **Supplement 1. Permeability to trypan blue changes rapidly upon cell rewarming**

1230 **a**, Number of viable K562 cells based on trypan blue staining after one day at 4°C and  
 1231 subsequent rewarming for 24 hours at 37°C. Numbers are normalized to initial cell counts. Dots  
 1232 indicate viable cell number based on trypan blue staining of cells after incubation at room  
 1233 temperature for 15, 30, or 60 minutes. Blue shaded regions indicate 4°C exposure and shaded  
 1234 pink regions indicate 37°C exposure. Red square indicates calculated cell counts after one day  
 1235 at 4°C based on the viable cell number measured after 24 hour rewarming. **b**, Viability of K562  
 1236 cells was assessed by trypan blue staining after incubation at room temperature for 0, 15, 30, or 60

1237 60 minutes following 24 hours at 4°C ( $n = 4$ ). Cells incubated at room temperature for 15  
1238 minutes show a significant increase in cell counts compared to cells counted immediately (\*\* $P =$   
1239 0.0016). Cells incubated at room temperature for 30 minutes show a significant increase in cell  
1240 counts compared to a 15-minute incubation (\*\* $P = 0.0023$ ), while no significant difference in  
1241 viability was observed between cells incubated for 30 or 60 minutes (ns,  $P = 0.4059$ ). **c-f**,  
1242 Viability of cells was assessed by trypan blue staining after incubation at 37°C for 0, 15, 30, or  
1243 60 minutes following 24 hours at 4°C ( $n = 4$ ). **c**, HEK293T, **d**, RPE1, **e**, HeLa, **f**, BHK-21. No  
1244 significant difference in cell viability was observed between cells incubated for 30 or 60 minutes  
1245 for HEK293T (ns,  $P = 0.3122$ ), RPE1 (ns,  $P = 0.5137$ ), HeLa (ns,  $P = 0.9735$ ), and BHK-21 (ns,  
1246  $P = 0.9998$ ) cells. All values show mean  $\pm$  SEM, with significance determined by one-way  
1247 ANOVA adjusted for multiple comparisons by Tukey's HSD. \* $P < 0.05$ ; \*\* $P < 0.01$ ; \*\*\* $P < 0.001$ ;  
1248 \*\*\*\* $P < 0.0001$ ; ns  $P > 0.05$ .  
1249

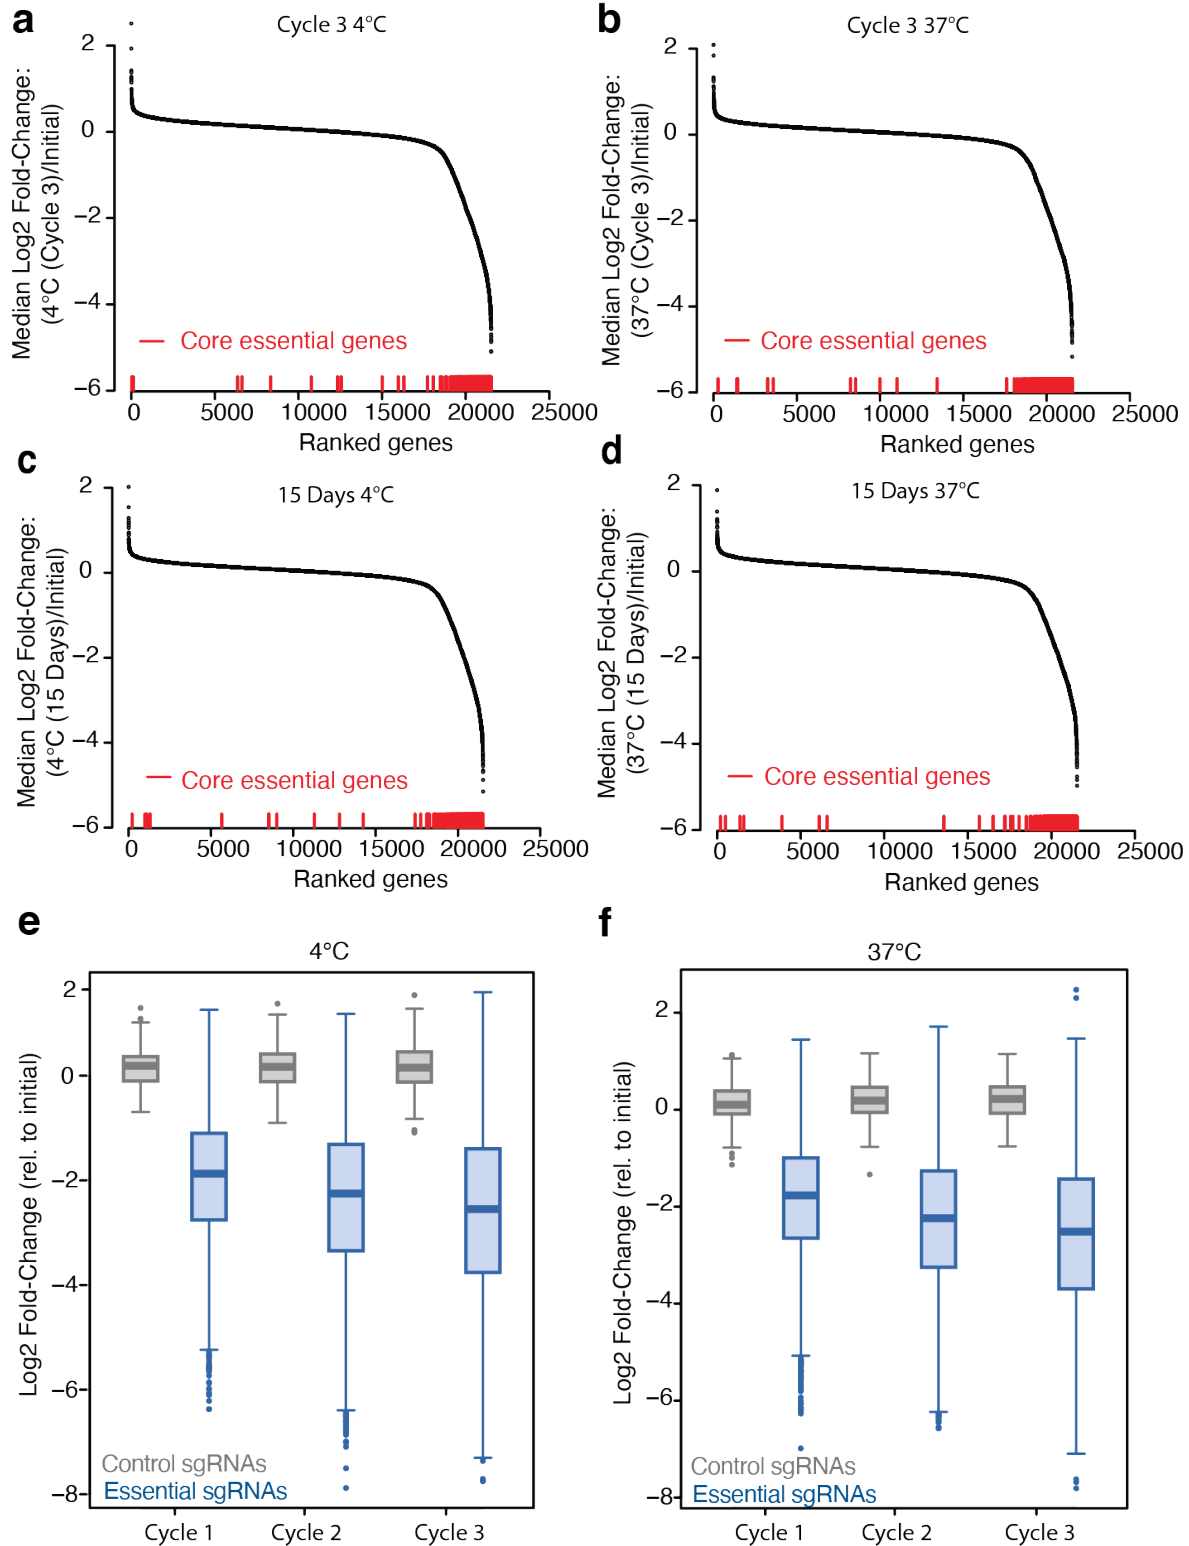

1250

1251

## Supplement 2. Depletion of Core Essential Genes in Genome-Wide BHK-21 Screens

1252

**a-d**, Genes ranked by median fold-change (log<sub>2</sub>) in genome-wide BHK-21 screens. **a**, after

1253

three cycles of cold exposure and rewarming (Cycle 3 4°C), **b**, matched constant 37°C control

1254 condition (Cycle 3 37°C), **c**, after 15 days of 4°C exposure (15 Days 4°C), **d**, matched constant  
1255 37°C control condition (15 Days 37°C). Core essential genes<sup>24</sup> indicated in red are positioned  
1256 below based on gene rank to demonstrate their depletion in each screen condition. **e-f**, Boxplots  
1257 showing log<sub>2</sub> fold change in representation for the population of control sgRNAs (gray; n = 250)  
1258 or sgRNAs targeting core essential genes<sup>24</sup> (blue; n = 4635) over **e**) three cycles of cold  
1259 exposure and rewarming (4°C) or **f**) constant 37°C control conditions. The line within each box  
1260 represents the median, the bounds of each box represent the first and third quartiles, and the  
1261 whiskers extend to the furthest data point within 1.5 times the interquartile range. A two-sided  
1262 Kolmogorov-Smirnov test was used to test the difference between each pair of control/essential-  
1263 gene-targeting sgRNA distributions (estimated p-value < 2.2e-16 for all six pairs in e and f).  
1264

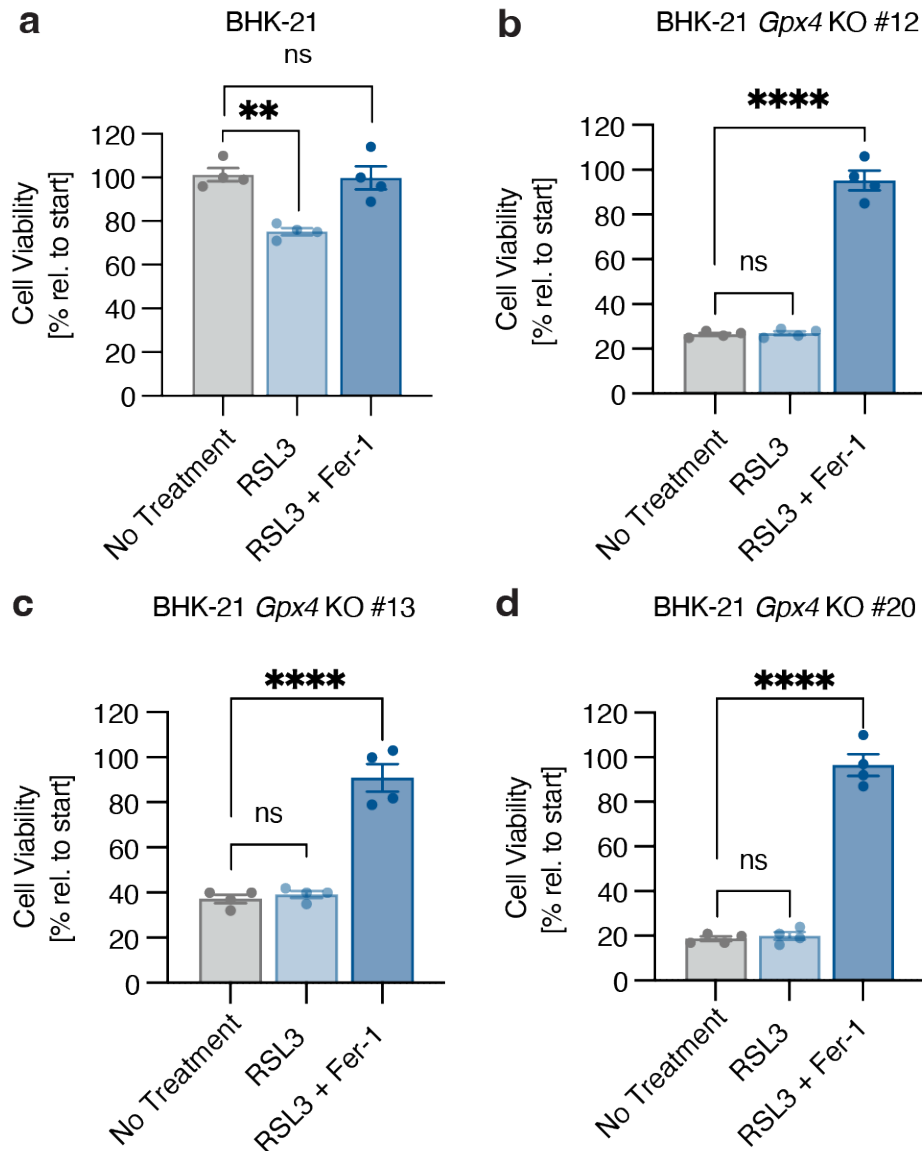

1265

1266

1267 **Supplement 3. RSL3 treatment has no effect on the viability of cold-exposed *Gpx4* KO**

1268 **BHK-21 cells.**

1269 **a-d**, Wild-type BHK-21 cells (**a**) and three independent *Gpx4* KO BHK-21 clonal lines (**b-d**) were

1270 treated with RSL3 (1  $\mu$ M) and ferrostatin-1 (Fer-1, 1  $\mu$ M) as indicated for 24 hours at 4°C ( $n = 4$ )

1271 prior to trypan blue staining. Wild-type BHK-21 cells show a significant decrease in cell viability

1272 when treated with RSL3 compared to no treatment (\*\* $P = 0.0013$ ), whereas *Gpx4* KO lines

1273 show no significant changes in viability (ns,  $P > 0.05$ ). All values show mean  $\pm$  SEM, with

1274 significance measured by one-way ANOVA adjusted for multiple comparisons by Dunnett's test.

1275 \* $P < 0.05$ ; \*\* $P < 0.01$ ; \*\*\* $P < 0.001$ ; \*\*\*\* $P < 0.0001$ ; ns  $P > 0.05$ .

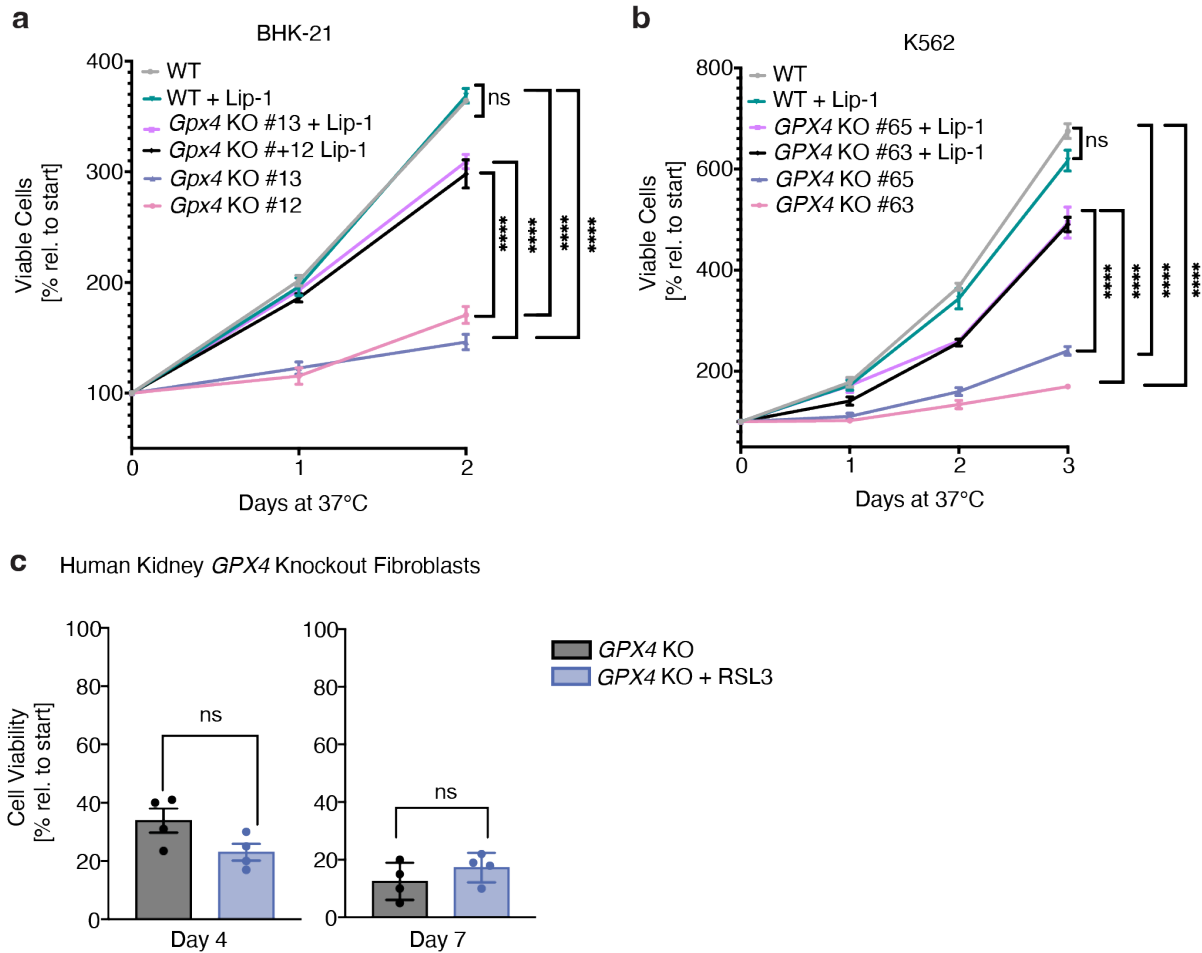

1276

1277 **Supplement 4. Growth of BHK21 and K562 GPX4 knockout cells and effects of RSL3**

1278 **treatment on human kidney fibroblast GPX4 knockout cells**

1279 **a**, Viable K562 cells recorded as percentage relative to start based on trypan blue staining over

1280 the course of 3 days at 37°C. Cell growth is significantly decreased in GPX4 K562 KO clones

1281 compared to WT K562 cells. Supplementation of lipoxstatin-1 (2.5 μM) increases cell viability in

1282 GPX4 KO cells and not WT cells at 37°C. **b**, Viable BHK-21 cells recorded as percentage

1283 relative to start based on trypan blue staining over the course of 2 days. Cell growth is

1284 significantly decreased in *Gpx4* BHK-21 KO cells compared to WT BHK-21 cells.

1285 Supplementation of lipoxstatin-1 (2.5 μM) increases cell viability in *Gpx4* KO cell and not WT

1286 cells at 37°C. **c**, Human kidney GPX4 KO cells were placed at 4°C and left untreated or treated

1287 with RSL3 (1 μM) for 4, and 7 days (n = 4). Treatment with RSL3 does not confer significant

1288 additional death (n=4 per timepoint and condition) as measure by two-tailed t-test. All values

1289 show mean ± SEM, with significance measured by one-way ANOVA adjusted for multiple

1290 comparisons with Tukey's HSD unless otherwise specified. \* $P < 0.05$ ; \*\* $P < 0.01$ ; \*\*\* $P < 0.001$ ;  
1291 \*\*\*\* $P < 0.0001$ ; ns  $P > 0.05$ .

1292

1293

1294

1295

1296

1297

1298



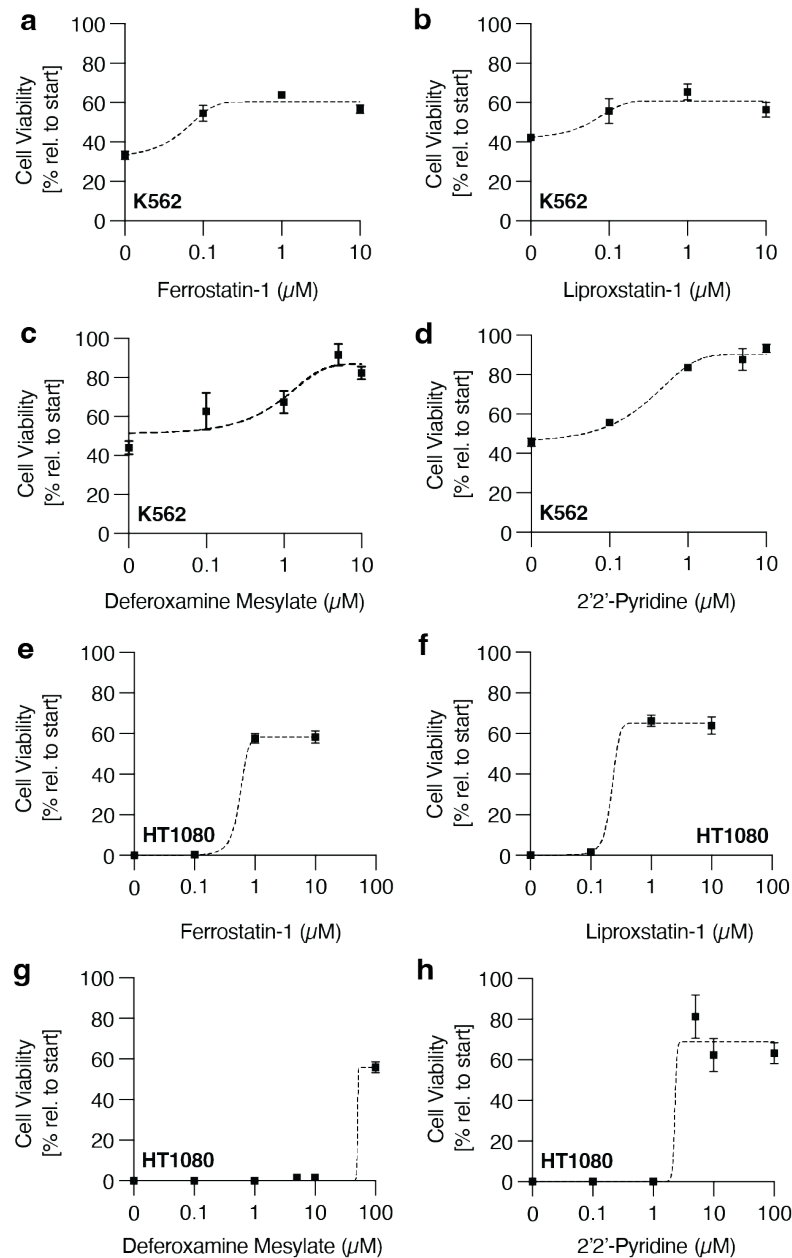

1299

1300

1301 **Supplement 5. Ferroptosis inhibitors and iron chelators increase cold cell viability in a**  
1302 **dose-dependent manner**

1303 **a-h**, K562 (**a-d**) and HT1080 (**e-h**) cells were treated with varying concentrations of the  
1304 ferroptosis inhibitors, ferrostatin-1 and liproxstatin-1, and iron chelators, deferoxamine and 2'2'-  
1305 pyridine, for four days at 4°C prior to assaying cell viability by trypan blue staining ( $n = 3$ ). All  
1306 values show mean  $\pm$  SEM.

1307

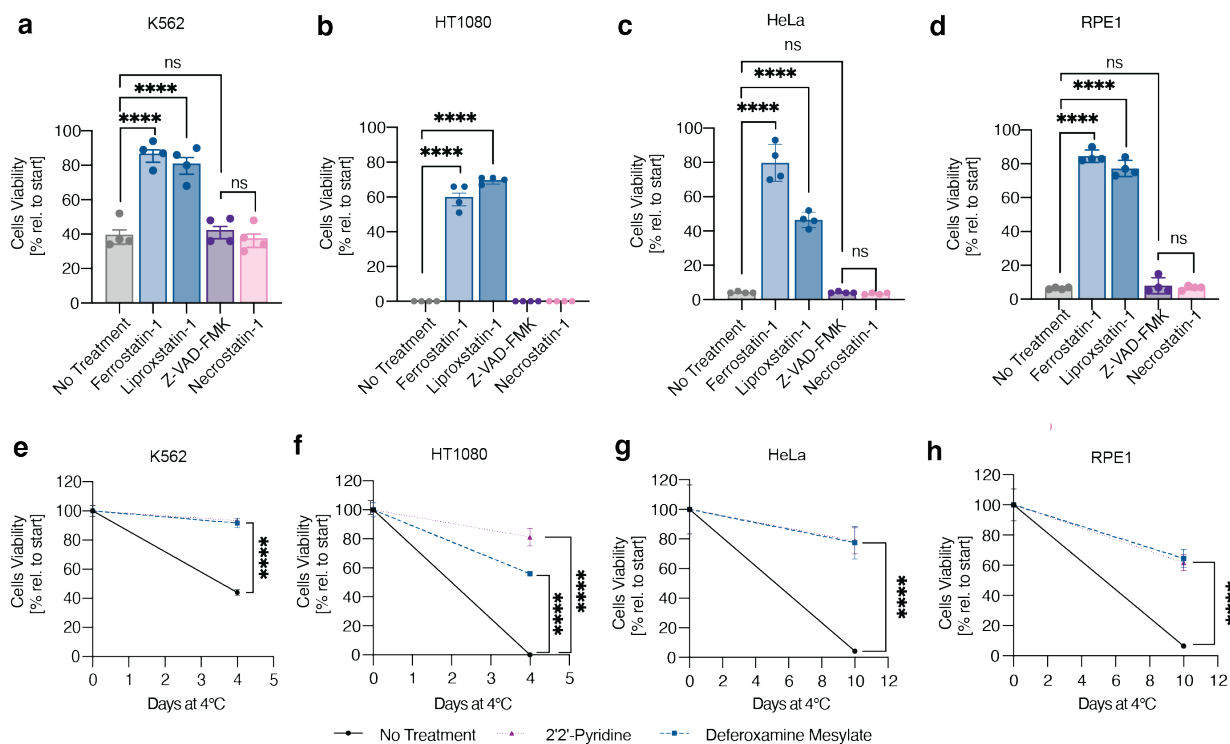

1308

1309

1310 **Supplement 6. Cells derived from non-hibernators undergo cold-induced ferroptotic cell**  
 1311 **death**

1312 **a**, K562 cells were treated with ferrostatin-1 (1  $\mu\text{M}$ ) (\*\*\*\* $P < 0.0001$ ), liproxstatin-1 (1  $\mu\text{M}$ ) (\*\*\*\* $P < 0.0001$ ), Z-VAD-FMK (1  $\mu\text{M}$ ) (ns,  $P = 0.9760$ ), or necrostatin-1 (1  $\mu\text{M}$ ) (ns,  $P = 0.9835$ ) for 4  
 1313 days at 4°C prior to trypan blue staining ( $n = 4$ ). **b**, HT1080 cells treated with ferrostatin-1 (1  $\mu\text{M}$ )  
 1314 (\*\*\*\* $P < 0.0001$ ), liproxstatin-1 (1  $\mu\text{M}$ ) (\*\*\*\* $P < 0.0001$ ), Z-VAD-FMK (1  $\mu\text{M}$ ), or necrostatin-1 (1  
 1315  $\mu\text{M}$ ) for 4 days at 4°C prior to trypan blue staining ( $n = 4$ ). **c**, HeLa cells treated with ferrostatin-1  
 1316 (1  $\mu\text{M}$ ) (\*\*\*\* $P < 0.0001$ ), liproxstatin-1 (1  $\mu\text{M}$ ) (\*\*\*\* $P < 0.0001$ ), Z-VAD-FMK (1  $\mu\text{M}$ ) (ns,  $P >$   
 1317 0.9999), or necrostatin-1 (1  $\mu\text{M}$ ) (ns,  $P = 0.9987$ ) for 10 days at 4°C prior to trypan blue staining  
 1318 ( $n = 4$ ). **d**, RPE1 cells treated with ferrostatin-1 (1  $\mu\text{M}$ ) (\*\*\*\* $P < 0.0001$ ), liproxstatin-1 (1  $\mu\text{M}$ )  
 1319 (\*\*\*\* $P < 0.0001$ ), Z-VAD-FMK (1  $\mu\text{M}$ ) (ns,  $P = 0.9291$ ), or necrostatin-1 (1  $\mu\text{M}$ ) (ns,  $P > 0.9999$ )  
 1320 for 10 days at 4°C prior to trypan blue staining ( $n = 4$ ). **e**, K562 cells treated with deferoxamine  
 1321 mesylate (5  $\mu\text{M}$ ) (\*\* $P = 0.0002$ ) or 2'2'-pyridine (10  $\mu\text{M}$ ) (\*\*\*\* $P < 0.0001$ ) for 4 days at 4°C prior  
 1322 to trypan blue staining ( $n = 3$ ). **f**, HT1080 cells treated with deferoxamine mesylate (100  $\mu\text{M}$ )  
 1323 (\*\*\*\* $P < 0.0001$ ) or 2'2'-pyridine (5  $\mu\text{M}$ ) (\*\* $P = 0.0002$ ) for 4 days at 4°C prior to trypan blue  
 1324 staining ( $n = 3$ ). **g**, HeLa cells treated with deferoxamine mesylate (5  $\mu\text{M}$ ) (\*\*\*\* $P < 0.0001$ ) or  
 1325 2'2'-pyridine (5  $\mu\text{M}$ ) (\*\*\*\* $P < 0.0001$ ) for 10 days at 4°C prior to trypan blue staining ( $n = 3$ ). **h**,

1327 RPE1 cells treated with deferoxamine mesylate (100  $\mu$ M) (\*\*\*\* $P < 0.0001$ ) or 2'2'-pyridine (5  
1328  $\mu$ M) (\*\*\* $P < 0.0001$ ) for 10 days at 4°C prior to trypan blue staining ( $n = 3$ ). All values show  
1329 mean  $\pm$  SEM, with significance measured one-way ANOVA adjusted for multiple comparisons  
1330 by Dunnett's test. \* $P < 0.05$ ; \*\* $P < 0.01$ ; \*\*\* $P < 0.001$ ; \*\*\*\* $P < 0.0001$ ; ns  $P > 0.05$ .  
1331

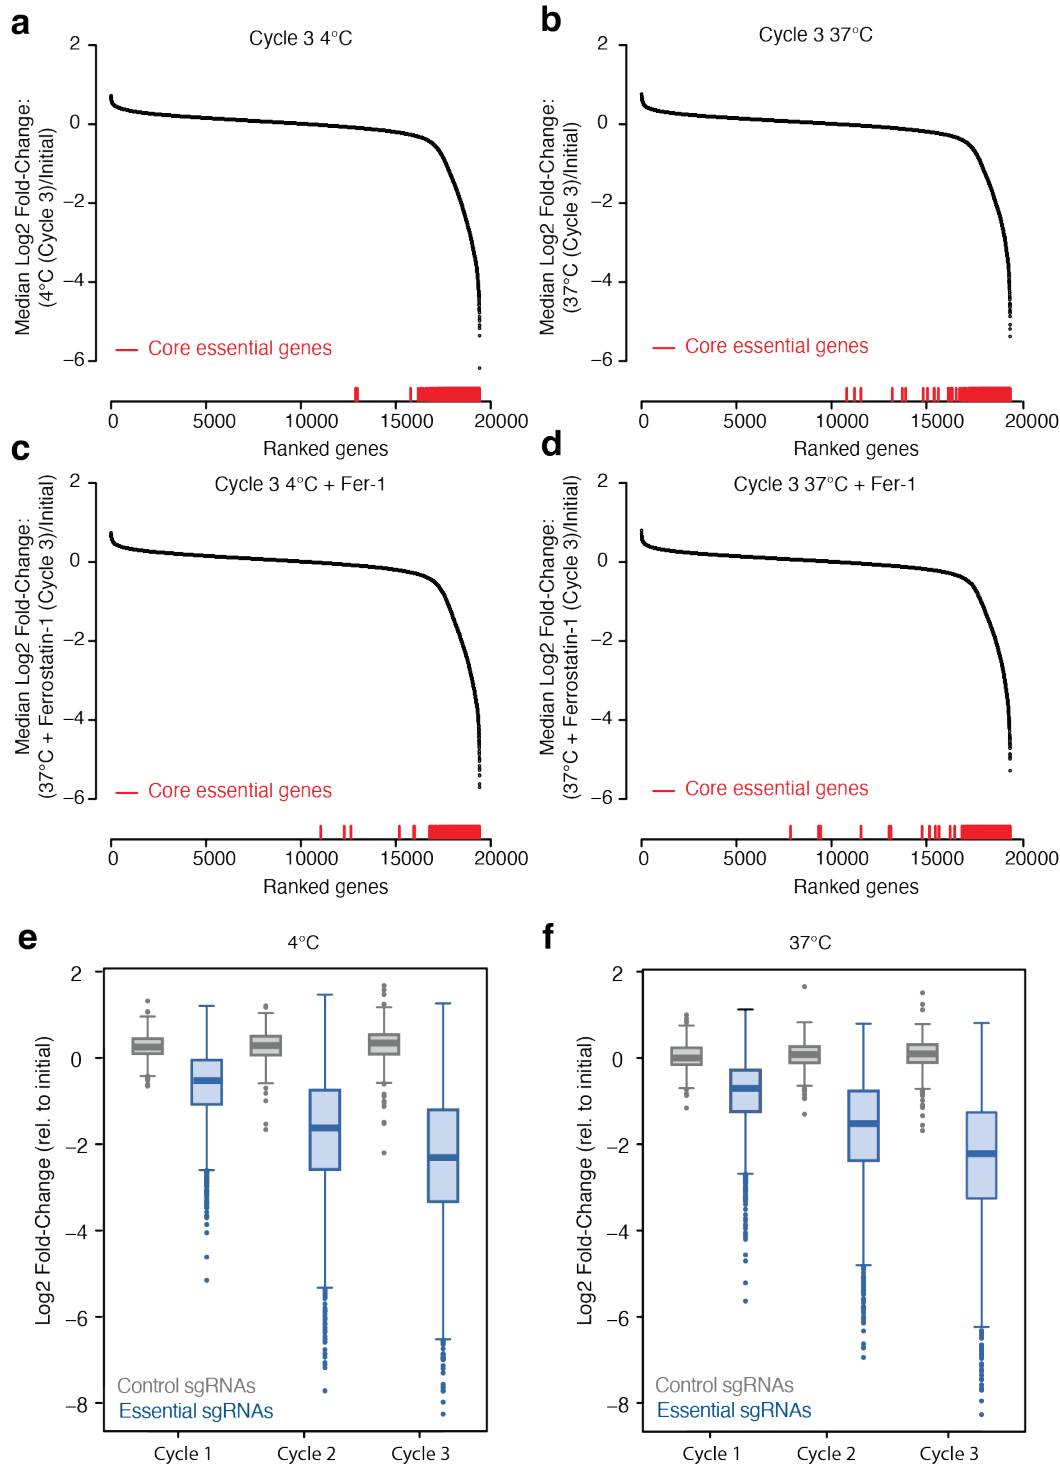

1332

1333

### 1334 Supplement 7. Depletion of Core Essential Genes in Genome-Wide K562 Screens

1335 **a-d**, Genes ranked by median fold-change (log<sub>2</sub>) in genome-wide K562 screens. **a**, after three

1336 cycles of cold exposure (Cycle 3 4°C), **b**, matched constant 37°C control condition (Cycle 3

1337 37°C), **c**, three cycles of cold exposure with 1  $\mu$ M ferrostatin-1 (Cycle 3 4°C + Fer-1), **d**,  
1338 matched constant 37°C control condition with 1  $\mu$ M ferrostatin-1 (Cycle 3 37°C + Fer-1). Core  
1339 essential genes<sup>24</sup> (red bars) are positioned below based on gene rank to demonstrate their  
1340 depletion in each screen condition. **e-f**, Boxplots showing the log<sub>2</sub> fold change in representation  
1341 for the population of control sgRNAs (gray; n = 500) or sgRNAs targeting core essential genes<sup>24</sup>  
1342 (blue; n = 3219) over **e**) three cycles of cold exposure (4°C) or **f**) constant 37°C control  
1343 conditions. The line within each box represents the median, the bounds of each box represent  
1344 the first and third quartiles, and the whiskers extend to the furthest data point within 1.5 times  
1345 the interquartile range. A two-sided Kolmogorov-Smirnov test was used to test the difference  
1346 between each pair of control/essential-gene-targeting sgRNA distributions (estimated p-value <  
1347 2.2e-16 for all six pairs in e and f).

1348

1349

1350

1351

1352

1353

1354

1355

1356

1357

1358

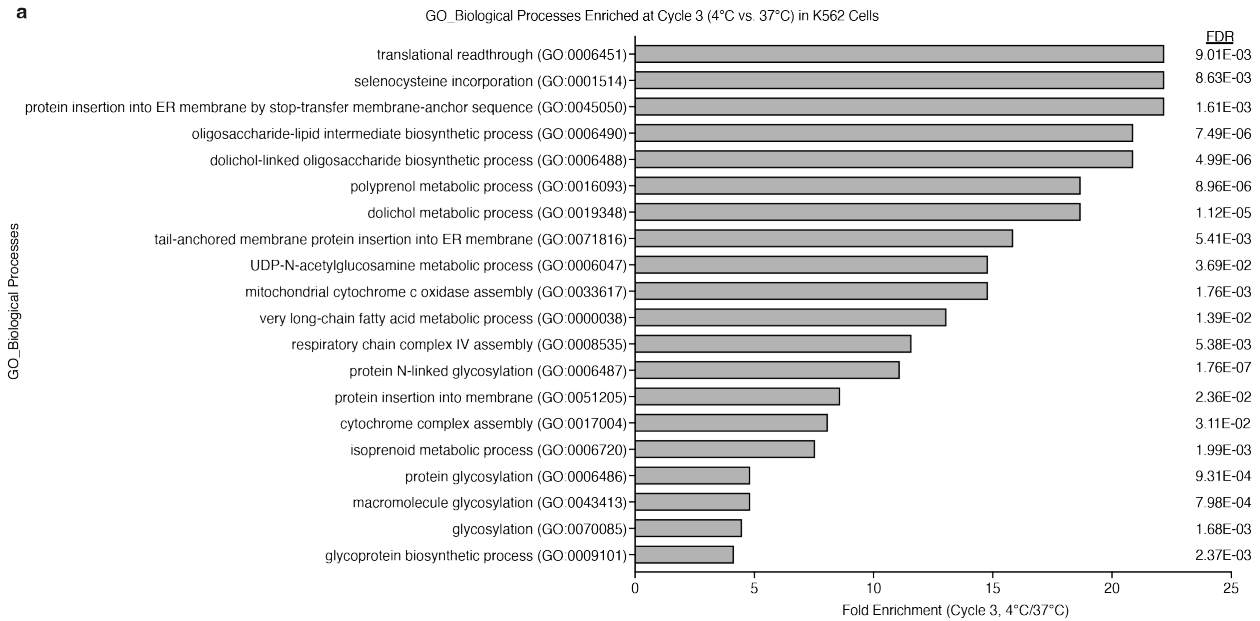

1359

1360

1361 **Supplement 8. Top 20 enriched pathways at Cycle 3 (4°C vs. 37°C) in K562 cells**

1362 a, Graphical representation of the top 20 enriched, differentially expressed gene sets (204  
 1363 genes; FDR < 0.1) from the genome-scale CRISPR-Cas9 screen in K562 cells (Cycle 3 4°C vs.  
 1364 3 passages at 37°C). GO\_Biological Processes Panther overrepresentation test was used to  
 1365 determine enriched gene sets. Functional annotation analysis of the selectively required genes  
 1366 identified pathways related to translational readthrough, selenocysteine incorporation, protein  
 1367 insertion into the ER, glycosylation, fatty acid metabolism, and mitochondrial respiration. A full  
 1368 list of pathways is provided in Table S6.

1369

1370

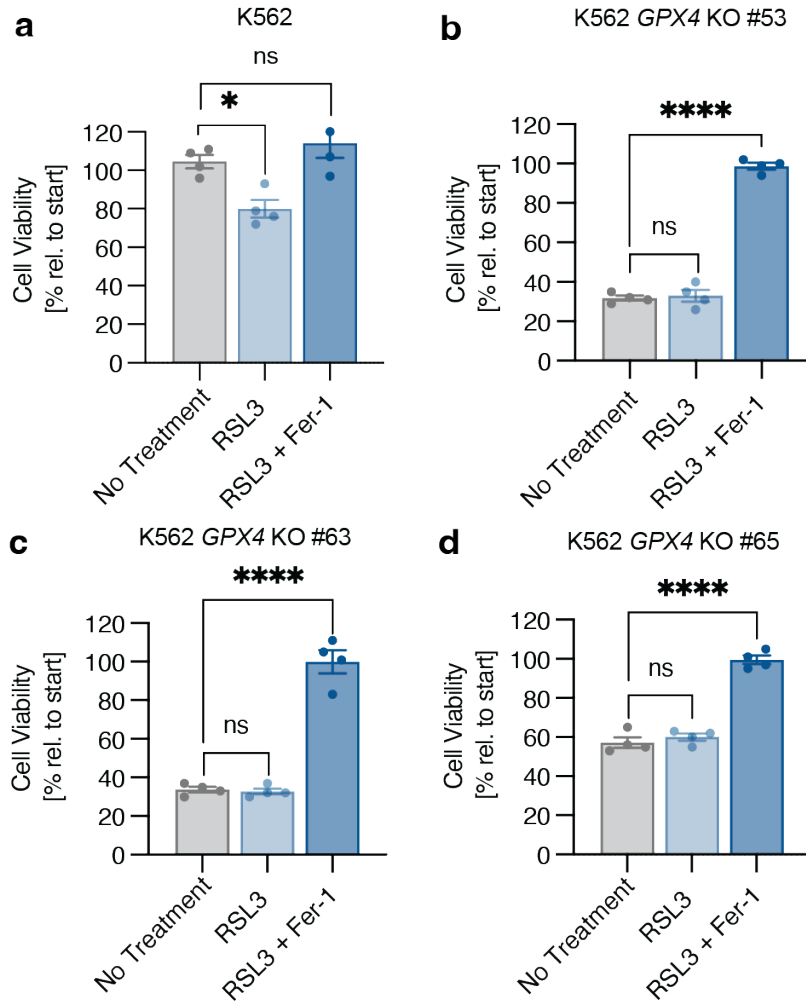

1371

1372

1373 **Supplement 9. RSL3 treatment has no effect on the viability of cold-exposed GPX4 KO**

1374 **K562 cells.**

1375 **a-d**, Wild-type K562 cells (**a**) and three independent GPX4 KO K562 clonal lines (**b-d**) were

1376 treated with RSL3 (1  $\mu$ M) and ferrostatin-1 (Fer-1, 1  $\mu$ M) as indicated for 8 hours at 4°C ( $n = 4$ )

1377 prior to trypan blue staining. Wild-type K562 cells show a significant decrease in cell viability

1378 when treated with RSL3 compared to no treatment (\* $P = 0.0213$ ), whereas GPX4 KO lines show

1379 no significant changes in viability (ns,  $P > 0.05$ ). All values show mean  $\pm$  SEM, with significance

1380 measured by one-way ANOVA adjusted for multiple comparisons by Dunnett's test. \* $P < 0.05$ ;

1381 \*\* $P < 0.01$ ; \*\*\* $P < 0.001$ ; \*\*\*\* $P < 0.0001$ ; ns  $P > 0.05$ .

1382

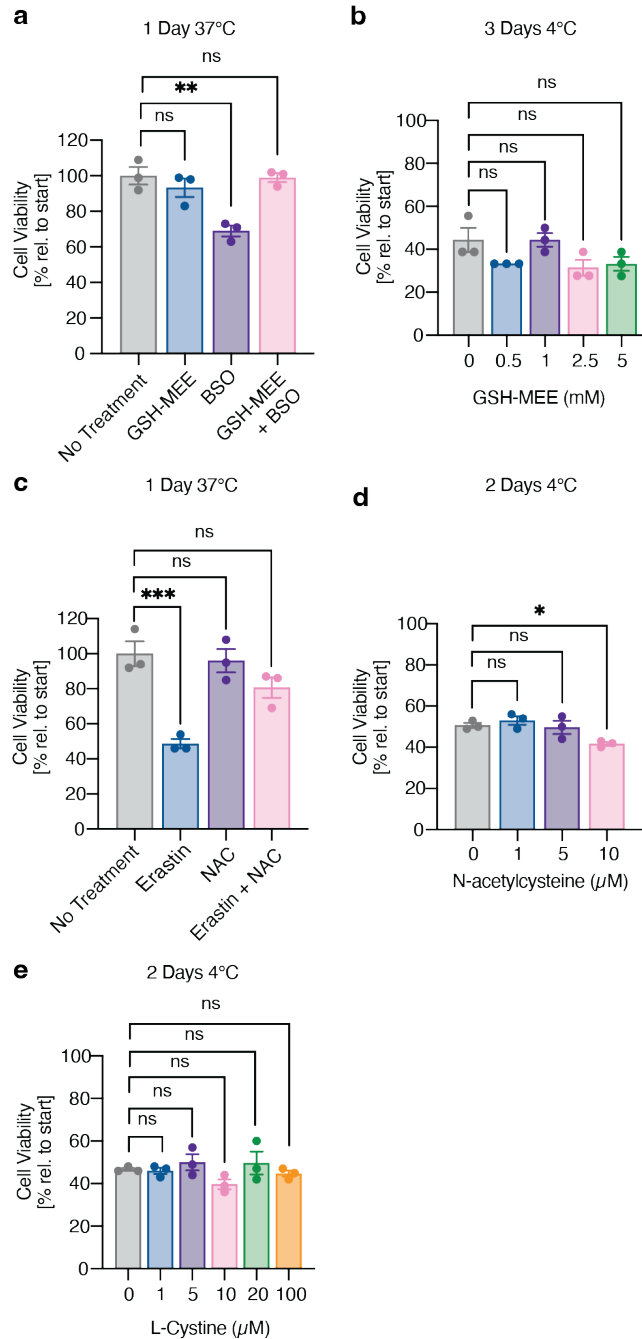

1383

1384

1385 **Supplement 10. Cell permeable glutathione and glutathione precursors do not increase**  
 1386 **cold cell viability**

1387 **a**, K562 cells were placed at 37°C and treated with cell permeable glutathione GSH-MEE (1 μM)  
 1388 and/or the glutathione synthesis inhibitor buthionine sulfoximine (BSO, 1 μM) for 1 day ( $n = 3$ ).  
 1389 Treatment with BSO resulted in increased cell death (\*\* $P = 0.0018$ ) that was rescued by GSH-  
 1390 MEE (ns,  $P = 0.9961$ ). **b**, Treatment with GSH-MEE has no effect on K562 cold-induced death



1391 after 3 days at 4°C as measured by trypan blue staining ( $n = 3$ , 5  $\mu\text{M}$ ; ns,  $P = 0.1558$ ). **c**, K562  
1392 cells were placed at 37°C and treated with ferroptosis inducer Erastin (10  $\mu\text{M}$ ) and N-  
1393 acetylcysteine (NAC, 10  $\mu\text{M}$ ) for 1 day ( $n = 3$ ). Treatment with Erastin resulted in increased cell  
1394 death ( $***P = 0.0006$ ) that was rescued by NAC (ns,  $P = 0.1091$ ). **d**, Treatment with N-  
1395 acetylcysteine does not increase cold cell viability in K562 cells after 2 days at 4°C as measured  
1396 by trypan blue staining ( $n = 3$ , 10  $\mu\text{M}$ ;  $*P = 0.0352$ ). **e**, Treatment with L-Cystine does not  
1397 increase cold cell viability in K562 cells after 2 days at 4°C as measured by trypan blue staining  
1398 ( $n = 3$ , 100  $\mu\text{M}$ ; ns,  $P = 0.9843$ ). All values show mean  $\pm$  SEM, with significance measured by  
1399 one-way ANOVA adjusted for multiple comparisons by Dunnett's test.  $*P < 0.05$ ;  $**P < 0.01$ ;  
1400  $***P < 0.001$ ;  $****P < 0.0001$ ; ns  $P > 0.05$ .

1401

1402

1403
